## 1 TITLE

2 Posterior inferotemporal cortex cells use multiple visual pathways to complement fine and  
3 coarse discriminations

4 **AUTHORS:** Ponce C.R. \*, Lomber S.G. and Livingstone M.S.

5 \* Corresponding author

## 6 ABSTRACT

7 In the macaque monkey brain, posterior inferior temporal cortex (PIT) cells are responsible  
8 for visual object recognition. They receive concurrent inputs from visual areas V4, V3 and V2. We  
9 asked how these different anatomical pathways contribute to PIT response properties by  
10 deactivating them while monitoring PIT activity. Using cortical cooling of areas V2/V3 or V4 and  
11 a hierarchical model of visual recognition, we conclude that these distinct pathways do not  
12 transmit different classes of visual features, but serve instead to maintain a balance of local- and  
13 global-feature selectivity in IT.

## 14 INTRODUCTION

15 Posterior IT (PIT) neurons are the penultimate stage of the ventral visual processing  
16 stream, comprising cortical areas V1→V2→V4→PIT→anterior IT (AIT). In addition to this main  
17 pathway, PIT also receives direct feedforward projections from V3 and V2<sup>1</sup>, and V4 receives direct  
18 inputs from V1. These short projections (V1→V4→PIT and V1→V2→PIT) have been called  
19 bypass pathways<sup>2</sup>, and they represent a significant fraction of the inputs to PIT: 14% of all neurons  
20 in the brain projecting to PIT are located in areas V2|3 (for context, 26% of inputs to PIT arrive  
21 from V4; only 1% of inputs to V1 come from the LGN)<sup>3,4</sup>. The remaining projections arise from AIT  
22 and the dorsal pathway. The goal of this study is to define the role of these different input  
23 pathways in PIT selectivity.

24 We recorded from an unbiased sample of PIT neurons while deactivating, by cooling,  
25 areas V2-V3 (together) and V4 (**Fig. 1a**). We measured PIT firing rates before and during cooling  
26 of V4 or V2|3, and quantified changes in the representational capacity of PIT. Using firing rate  
27 statistics and linear classifiers (i.e. support vector machines), we found that while V4-dependent  
28 inputs were more important for preserving the representation of the identity of images in PIT, the  
29 different concurrent pathways did not transmit different types of visual features (such as different  
30 proportions of curvature or spatial frequency). We modeled the contributions of short- and long-  
31 pathways using the standard model of visual recognition<sup>5</sup>, and observed that short pathways were  
32 well-positioned for fine feature discriminations. We confirmed that fine-feature discrimination was  
33 relatively better preserved during cooling compared to coarse-feature discrimination. We  
34 simulated the effects of cooling on decoding accuracy using various random cooling effects  
35 models, and found that while these random models predicted an overall loss of accuracy, they  
36 did not predict the preservation of decoding accuracy for fine discriminations. Thus we conclude  
37 that short pathways are helpful in fine discrimination, because their receptive field weights match  
38 simpler image elements. By introducing units with simpler preferences into PIT, the short  
39 pathways create a diversity of feature preferences available for downstream perceptual  
40 operations.

## 41 RESULTS

### 42 Cooling affected portions of PIT response fields

43 We implanted floating microelectrode arrays in the PIT of two adult male monkeys (2  
 44 arrays in monkey R and 3 arrays in monkey G), along with cryoloops on dorsal V2, V3 and V4<sup>6,7</sup>.  
 45 The arrays were placed anteriorly to the inferior occipital sulcus, the cryoloops were placed within  
 46 the lunate sulcus and over the predorsal gyrus (**Fig. 1b**). We activated the cryoloops  
 47 intraoperatively, using thermal imaging to plot the extent of cooling and found that the lower  
 48 thermal region was limited to 1-1.5 mm around and within the cryoloop (**Fig. 1c**). The flat area of  
 49 cortex directly cooled by the cryoloops was around 13 x 5 mm<sup>2</sup>. The electrode arrays were at least  
 50 5 mm anterior to the prelunate cryoloop, and anterior to the inferior occipital sulcus. Three weeks  
 51 after each surgery, we measured the retinotopic response fields of the arrays and the retinotopic  
 52 size of the cooling scotomas: the animals maintained their gaze on a 0.4°-diameter central black  
 53 circle, while a 2°-diameter image was flashed randomly within a 16 x 16° radial grid. We collected  
 54 spike data before, during and after activation of the V2/V3 or V4 cryoloops, counterbalancing the  
 55 order of the V4 vs. V2|3 deactivations. The mean PIT population response fields were centered  
 56 on the perifoveal upper contralateral hemifield (**Fig. 1d**). In contrast, the V4 and V2|3 scotomas  
 57 were centered towards the perifoveal lower hemifield, as predicted by the dorsal retinotopic  
 58 representations of V2, V3 and V4. In subsequent experiments, stimuli were sized to fit within the  
 59 overlapping region of both scotomas (**Fig. 1e**) (1.4°-wide images for monkey G, 2.0°-wide images  
 60 for monkey R).

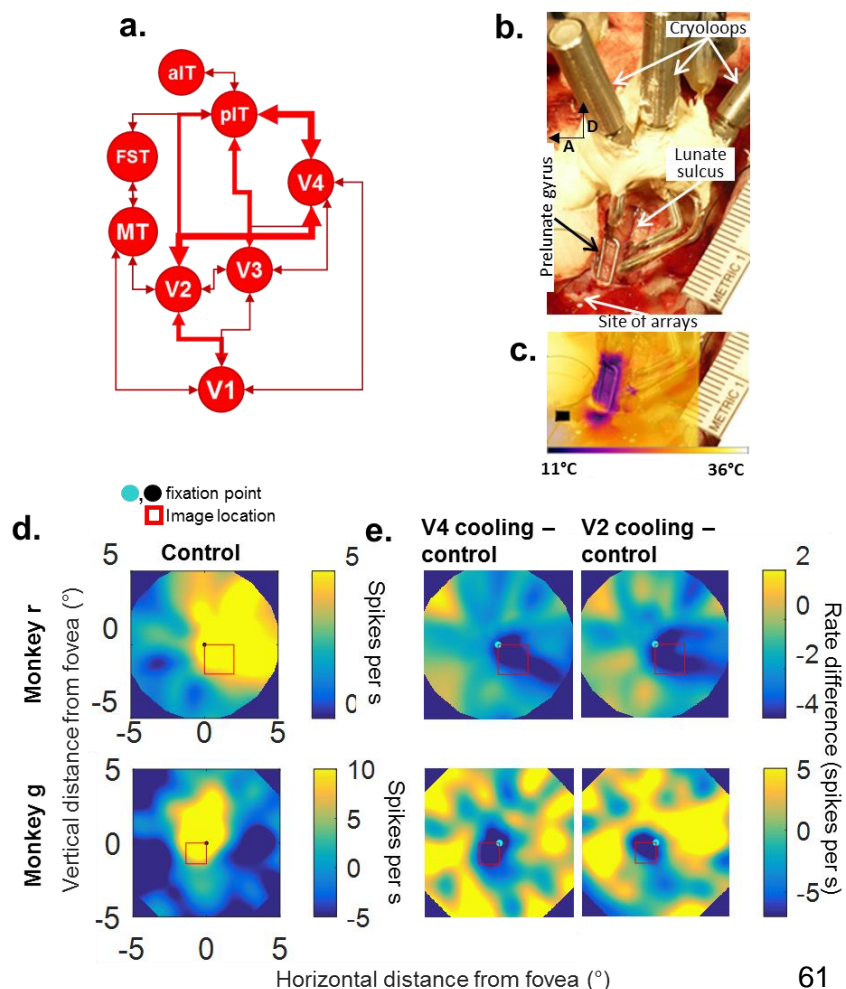

**Figure 1. Cooling affected portions of the aggregate PIT response fields.**

**a.** Input network to posterior IT (PIT).

**b.** Intraoperative picture, monkey R left hemisphere. Posterior craniotomy showing the location of the lunate sulcus, prelunate gyrus and V2/V4 cryoloops. The arrays were later implanted where shown by the label. A: anterior, D: dorsal.

**c.** Composite image showing the superimposed thermal and visible light images, while the prelunate gyrus loop is active. The black square shows the approximate location of the arrays.

**d.** Average firing rate for all units, evoked by flashing an image in a 8 x 8° grid, during the control (warm) condition.

**e.** Difference in activity during cooling of area V4 (left column) or V2|3 (right column) – the control map was subtracted from the cooling map. Dark regions show reductions in firing rate.

62

### 63 Cooling reduced firing rates in PIT units and decoding accuracy by linear classifiers

64 In all the following experiments, we showed the fixating animals 293 images belonging to  
65 15 different categories (angles, animals, artificial objects, curves, faces, radial and linear gabors,  
66 joint angles, plants, places, noise textures and tristar; the entire image set is shown in  
67 **Supplementary Fig. 1**). When we cooled either set of coils, PIT multiunits reduced their visually  
68 evoked spike rates (**Fig 2a**). During control conditions, PIT multiunits showed a median visual  
69 response of  $18 \pm 1$  (monkey R) and  $22 \pm 2$  (Monkey G) spikes/s (range of -3 to 120 spikes per  
70 second relative to baseline for monkey R; -12 to 106 spikes per s for monkey G). When the V2/V3  
71 loops were cooled, the overall average rate was reduced to  $13 \pm 1$  and  $14 \pm 1$  spikes/s (monkeys R,  
72 G). When the V4 cryoloops were cooled, the overall rate was reduced to  $12 \pm 1$  and  $15 \pm 1$  spikes/s  
73 (monkeys R, G; probability that all means come from same distribution  $P = 6 \times 10^{-4}$  and  $1 \times 10^{-4}$ ,  
74 one-way ANOVA,  $N_{\text{sites}} = 300$  and  $256$ ,  $F(2, 897) = 8.1$ ,  $F(2, 765) = 8.9$ ). In one animal, we cooled  
75 both V4 and V2|3 loops concurrently, measuring a similar reduction in firing rate (38%); cooling  
76 both sets of loops did not silence PIT activity. Another measure of input strength is response  
77 latency, and here we similarly observed little difference between V2/V3 cooling and V4 cooling  
78 (see **Supplementary Section 1**).

79 Next we used pattern analysis to quantify the encoding capacity of PIT during V4 or V2|3  
80 cooling. We trained statistical classifiers (support vector machines with a linear kernel, or SVMs)  
81 using data from each experimental condition (before cooling, during V4 or V2|3 cooling). SVMs  
82 were used in an all-vs.-all approach, so chance performance was 50% per comparison. We had  
83 few trials per image during each cooling condition (4-6) and so we used leave-one-out cross-  
84 validation for each paired comparison. To further guard against unreliable values due to the small  
85 sample number, we also trained SVMs using the same data but shuffling the image labels. Thus,  
86 accuracy was defined as the mean of all cross-validation cycles using the correct labels minus  
87 the mean of cross-validation cycles using the shuffled labels, so a range of 0-0.5 is equivalent to  
88 50-100% accuracy.

89 First, this decoding analysis showed that faces elicited the highest classification accuracy  
90 in both animals, which was notable because we did not pre-select the array implantation sites by  
91 proximity to fMRI-defined face patches. SVMs showed a median accuracy value of  $0.25 \pm 0.01$  and  
92  $0.26 \pm 0.01$  above baseline (monkeys R, G, standard error of the median). During V4 deactivation,  
93 median accuracy dropped to  $0.16 \pm 0.01$  and  $0.17 \pm 0.01$ ; during V2|3 deactivation, median  
94 accuracy dropped to  $0.19 \pm 0.01$  and  $0.20 \pm 0.01$ . These median accuracy values were statistically  
95 different at the group level (monkeys R, G:  $P = 5 \times 10^{-12}$ ,  $3 \times 10^{-23}$ , one-way Kruskal-Wallis,  $N_{\text{images}} =$   
96  $347, 293$ ,  $\chi^2(2, 1038) = 52$ ,  $\chi^2(2, 876) = 104$ ). The differences in median values between V4 and V2|3  
97 cooling were statistically reliable in both animals (monkeys R and G:  $P = 2 \times 10^{-5}$ ,  $4 \times 10^{-3}$ , two-tailed  
98 Wilcoxon sign rank test,  $N = 347, 293$  accuracy values, Z-stats: -4.3, -2.9, **Fig. 2b**, bottom, and  
99 **Fig. 2c**). We also performed an SVM category classification analysis, grouping responses by  
100 category, not as individual images. We also found that deactivating V4-inputs reduced category  
101 classification accuracy more than did deactivating V2|3 (**Supplementary Section 2, Fig. S2 and**  
102 **S3**).

103 In summary, PIT multiunits showed similar mean firing rate reductions during V2|3 or V4  
104 deactivation, but in both monkeys, SVM accuracy was reduced more by V4 deactivation. This  
105 suggests that V4 direct inputs are more important for image identification and categorization, and  
106 that this cannot be explained by a simple reduction in mean spike rate. We further explored the

107 reasons why decoding accuracy shows a quantitatively stronger role for V4 using a  
 108 multidimensional projection analysis, described in **Supplementary Section 3**.

109

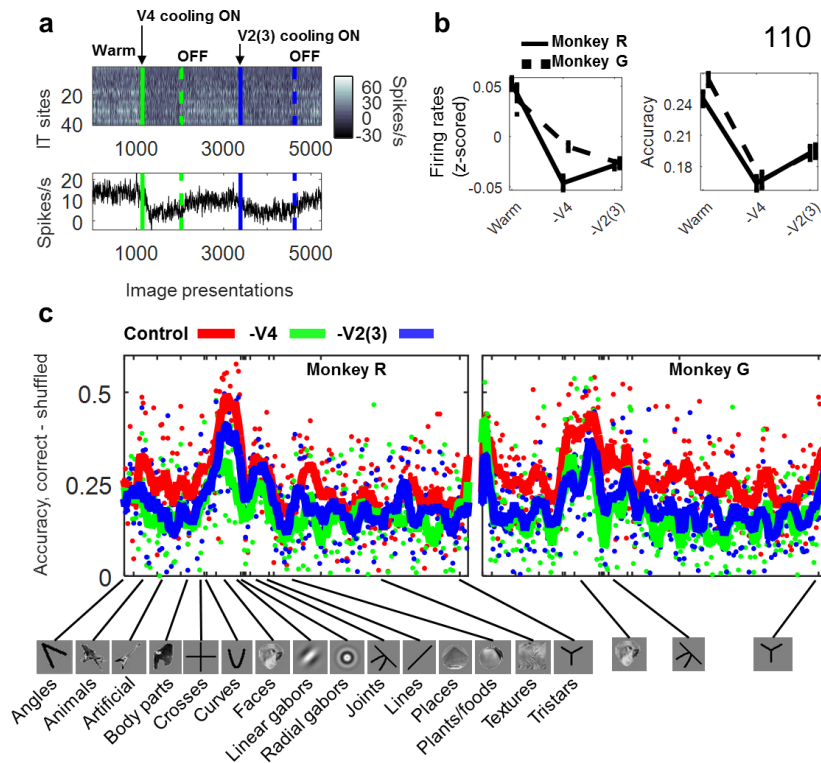

**Figure 2. Effects of cooling on firing rate and classification accuracy.**

**a.** (top) Data from one cooling session (monkey R, day 1). The top figure shows the evoked spike rates from 50 PIT sites (rows) recorded concurrently before, during and after cooling of V4 and V2/3. Each column represents one image presentation. Solid lines mark the onset of each cooling condition, broken lines show the onset of the rewarming periods. (bottom) Mean firing rate across each temperature condition.

**b.** (top) Average firing rate activity (z-scored) for all channels during each temperature condition. (bottom) Average classification accuracy for all images during each temperature condition.

**c.** Mean cross-validated accuracy for each image before and during cooling (red = control, green = V4 cooling, blue = V2/3 cooling). The x-axis shows all 293 images listed alphabetically by their category.

111 **Cooling effects on median accuracy were simulated by random processes**

112 To gain a better understanding of the drop in decoding performance during input cooling,  
 113 we asked how much of the accuracy impairment could be attributed to non-specific fractional  
 114 reductions in firing rate. We modeled three mechanisms of cooling rate reductions: 1) each IT  
 115 multiunit underwent a given fractional reduction across all of its responses (a *site-by-site* cooling  
 116 mechanism); 2) all multiunits underwent the same fractional reduction, but the reduction could  
 117 vary over time (a *temporal* mechanism); finally, 3) each multiunit underwent a mix of *site-by-site*  
 118 and *temporally dependent* reductions. We first examined the effects of each cooling mechanism  
 119 using a model. In neural activity space, where images are represented as coordinate positions in  
 120 a multi-dimensional space (**Fig. 3a**), these cooling effects would induce different geometric  
 121 transformations and thus affect decoding accuracy differently. Consider the first mechanism of  
 122 site-by-site cooling: this has no effect on classification accuracy, because each site's responses  
 123 are normalized before classification; it makes no difference if the lengths of the population  
 124 response vectors change, as long as they keep the same direction (**Fig. 3b-c, i**). This is a  
 125 plausible compensation because normalization is a common mechanism in cortical computations.  
 126 The second mechanism, temporally dependent reductions, where cooling imposes a different  
 127 fractional value on the whole population vector at different times, pulls and stretches the pre-  
 128 cooling response vector groups towards a minimum (**Fig. 3b-c, ii**). The third mechanism, where  
 129 individual multi-unit sites undergo different fractional reductions over time, is interesting because

130 it changes the direction of the vectors, directly affecting the image representations in activity  
 131 space (**Fig. 3b-c, iii**).

132 We applied each mechanism to our control (warm) data to simulate the cooling drop in  
 133 decoding performance. First we measured the distribution of fractional cooling changes during  
 134 cooling. In monkey R, the median fractional reduction during V4 cooling was 0.68 (25th, 75th  
 135 quantiles: 0.51-0.80), and during V2|3 cooling, 0.73 (25th, 75th quantiles 0.59-0.84). For monkey  
 136 G, the median fractional reduction during V4 cooling was 0.67 (25th, 75th quantiles 0.54-0.82),  
 137 and during V2|3 cooling 0.62 (25th, 75th quantiles 0.48-0.74). Note that some of these fractional  
 138 changes included increased firing rates during cooling, but this was expected from weakly firing  
 139 multiunits. Next, we sampled these fractional distributions (with replacement) and multiplied each  
 140 sampled fraction times the control (warm) response counts. These multiplications were done  
 141 using either the site-by-site cooling mechanism, the temporally dependent cooling mechanism, or  
 142 the mixed mechanism. As a form of cross-validation, the fractional gain distributions came from  
 143 different days from the control data. We created 20 “cooling” populations, based on V4 and V2|3  
 144 cooling, per monkey.

145 Before cooling, the mean decoding accuracy for both animals was  $26 \pm 1\%$  over baseline,  
 146  $16 \pm 1\%$  during V4 cooling and  $19 \pm 1\%$  during V2|3 cooling. We found that the site-by-site spike  
 147 mechanism did not reduce decoding accuracy (its value remained  $26 \pm 1\%$ , same as control). The  
 148 temporally dependent mechanism reduced decoding accuracy to  $15 \pm 1\%$  over baseline. The  
 149 mixed mechanism lowered accuracy as a function of the number of responses that were randomly  
 150 affected: if we multiplied 100% of all responses by the random fractions, decoding accuracy was  
 151 reduced to  $16 \pm 1\%$ . To match the experimental reductions in accuracy, we had to affect between  
 152 40-80% of all responses, which resulted in 18-22% decoding accuracy, **Fig. 3d**). In summary, we  
 153 could not account for the observed reduction in decoding accuracy by a uniform fractional in  
 154 spikes within each multiunit site, but a temporally varying reduction or a mix of site-by-site and  
 155 temporally varying reductions could account for the mean decoding accuracy loss during cooling.

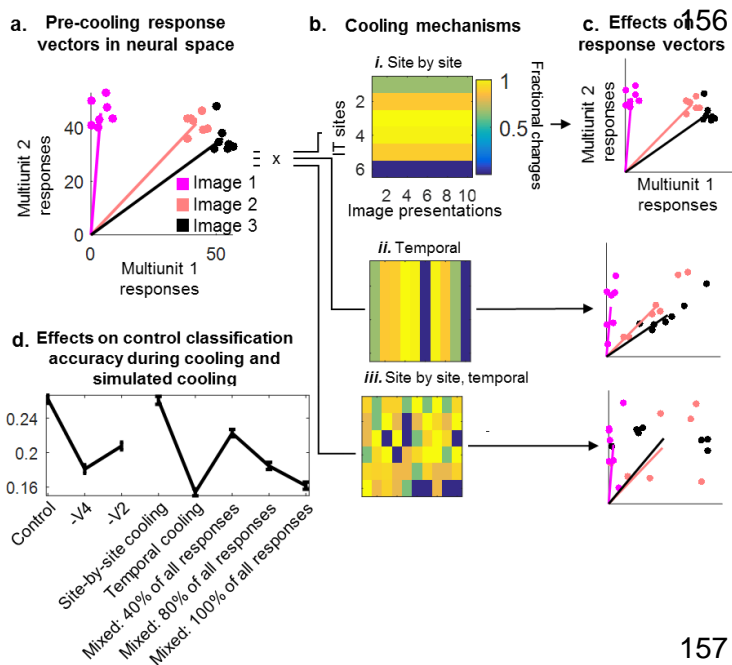

**Figure 3. Cooling simulations.**

**a.** Hypothetical responses of two units (axes) to three different images (colors), each presented seven times each (points). **b.** Different mechanisms of cooling. Cooling may impose a fixed fractional change in a channel-by-channel basis, a temporal basis, or a combination of the two. **c.** Responses in (A) transformed by each “cooling” reduction rate mechanism. **d.** Mean accuracy values (baseline-subtracted,  $\pm$  standard error) measured before cooling (“control,” “-V4,” “-V2|3”, both monkeys combined), and after different cooling simulations (“site-by-site”, “temporal”, and “mixed”). For the “mixed” simulations, each percentage shows the fraction of responses that were randomly multiplied by the gain values.

157

158

## Cooling reduced selectivity of individual PIT multiunits

159 Cooling inputs to PIT reduced classification accuracy at the population level. To examine  
160 accuracy at the level of individual sites, we measured selectivity using an F-test. Let us say that  
161 PIT units were selective to specific images if the mean variance of their spike counts to different  
162 images was greater than the mean variance of their spike counts to each image (F-statistic); the  
163 value 1 suggests no selectivity; the greater the value, the more selective. We called the F-test  
164 statistic per channel before cooling  $F_{control}$ , during V4 cooling  $F_{-V4}$  and during V2|3 cooling,  $F_{-V2|3}$ .  
165 If the distributions of  $F_{-V4}$  and  $F_{-V2|3}$  are closer to the non-selectivity value of 1 compared to the  
166  $F_{control}$  distribution, this would suggest that PIT sites became less selective during cooling.

167 Each PIT site gave one  $F_{control}$ , one  $F_{-V4}$  and one  $F_{-V2|3}$  value. We plotted each control  $F$   
168 value against its counterparts and found that cooling F-stats were mostly lower than the warm  
169 distribution (**Fig. 4c**, Monkey R, median  $F \pm$  standard error, Warm:  $1.13 \pm 0.03$ , -V4:  $1.10 \pm 0.01$ , -  
170 V2|3:  $1.14 \pm 0.02$ ; Monkey G, Warm:  $1.21 \pm 0.05$ , -V4:  $1.13 \pm 0.02$ , -V2|3:  $1.14 \pm 0.02$ ). However, there  
171 was no statistical difference among these values ( $P = 0.20, 0.20$ , Kruskal-Wallis,  $N = 300, 256$   
172 sites,  $\chi^2(2,897)=3, \chi^2(2,765)=3$ ). The reason there was no statistical difference is that many of the  
173 PIT sites were not that selective to start with, having pre-cooling  $F$  stats already bottomed out at  
174 1. Still, units with higher pre-cooling  $F$  values showed greater changes during cooling. To quantify  
175 this observation, we asked if the slope describing the relationship between the pre-cooling and  
176 cooling  $F$  values was statistically different from unity. We used a bootstrap approach. For 1,000  
177 iterations, we re-sampled sites with replacement and used their  $F_{control}$ ,  $F_{-V4}$  and  $F_{-V2|3}$  values to fit  
178 linear regression lines between control and -V4 values, and between control and -V2|3 values.  
179 This analysis resulted in 1,000 slopes describing the  $F_{control}$  and  $F_{-V4}$  relationship, and another  
180 1,000 slopes describing the  $F_{control}$  and  $F_{-V2|3}$  relationship. None of these slope values overlapped  
181 the line of unity (Monkey R, mean slope  $\pm$  SEM, control vs. -V4:  $0.64 \pm 0.03$ , control vs. -V2|3:  
182  $0.82 \pm 0.04$ ; Monkey G, control vs. -V4:  $0.53 \pm 0.04$ , control vs. -V2|3:  $0.59 \pm 0.03$ ). We also noticed  
183 that the mean  $F_{control} / F_{cooling}$  slope was shallower during V4 cooling than V2|3 cooling in both  
184 animals. This implied that PIT multiunits became less selective during V4 cooling than during V2|3  
185 cooling. This difference in slope was significant using a randomization test, which shuffled  $F_{cooling}$   
186 values from the V4 and V2|3 conditions and asked if this mixed distribution could produce the  
187 observed slope (one-tailed randomization test,  $P = 0.001$  and  $0.02$ ; see Methods for details).

188 We further asked whether there was any relationship between the retinotopic location of  
189 a PIT response field relative to the cooling scotomas, and its subsequent selectivity (F-statistic)  
190 change. The images were presented at the intersection of the V4 and V2|3 scotomas. Therefore,  
191 some individual multiunit PIT response fields (RFs) would cover more of the stimulus than others.  
192 For each PIT site, we measured the fraction of its RF that overlapped the stimulus/scotoma, and  
193 correlated this value against the subsequent change in selectivity (F-statistic). The RF overlap  
194 measure was computed using data from different recording days. There was a small but  
195 statistically reliable correlation of RF overlap with selectivity change (selectivity change was  
196 defined as  $F_{control} - F_{cooling}$ ): during V4 cooling, the Pearson correlation coefficient was 0.19 and  
197 0.32 (monkeys R and G:  $P = 1.2 \times 10^{-3}$  and  $1.3 \times 10^{-7}$ , Student's t-test,  $N = 300, 256$  sites). During  
198 V2|3 cooling, the correlation coefficient was 0.11 and 0.26 ( $P = 0.06$  and  $2.3 \times 10^{-5}$ ). Note that the  
199 stimuli were placed in the same overlapping region between both -V4 and -V2|3 scotomas, so  
200 the lower correlation values for V2|3 cooling are not due to differences in scotoma overlap; rather  
201 it is because the selectivity change is less pronounced for V2|3 cooling (if there was no selectivity  
202 change, the correlation would be zero). We conclude that PIT multiunits lost selectivity across  
203 images as a function of RF location.

204

205

a. F-ratio per cooling condition

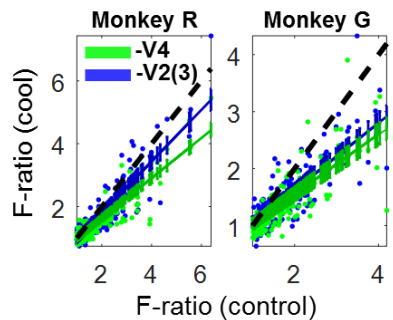

Figure 4. Selectivity of individual PIT sites before and during cooling.

(a) Scatterplots of F statistics (warm vs. -V4: green, warm vs. V2|3, blue). Each point shows the paired F-ratios for a given channel, measured before and during cooling. The solid colored lines show the mean slope describing the control and cooling F-ratio distributions. The error bars around each slope show the standard error. The broken black line shows unity.

(b) Differences in slopes expected given a mixed temperature distribution (solid curve = distribution from monkey R data, broken line = monkey G). The vertical lines show the experimental difference.

b. Slopes from randomized V4-V2 F-stats

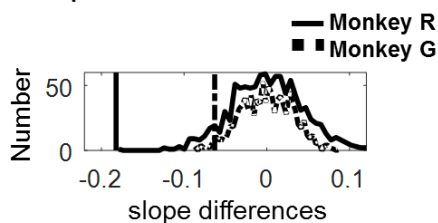

206

Cooling did not reveal shape-specific deficits

207

208

209

210

211

212

213

214

215

216

217

218

219

220

221

222

223

224

225

226

227

228

We used regression analyses to find image features especially affected by cooling. These features could be anything encoded by PIT, including luminance, contrast<sup>8</sup>, orientation content, curvature content<sup>9</sup> and categorical membership (e.g. “faces,” “body parts,” “tristars”, **Fig. 5**). In addition to these features, we used principal component analysis on our images to extract 87 different quantitative descriptors for each of our 293 images (see **Supplementary Fig. 5**). We also used experimental predictors, such as the mean population spike rate per image (before cooling), and the mean decoding accuracy evoked per image (before cooling). We used all 87 features in a linear regression analysis that could explain the change in decoding accuracy per image. In both monkeys, the only consistent predictor of V4- or V2|3-cooling accuracy loss was the magnitude of classification accuracy before deactivation: the larger the classification accuracy for each image before deactivation, the larger the subsequent reduction in accuracy. During V4 cooling, the percentage of variation explained by each model was 45-55% (monkeys R and G:  $R^2 = 0.45$  and  $0.55$ ,  $P = 4 \times 10^{-6}$  and  $1.74 \times 10^{-7}$ ,  $F(100,246)$ : 2.0,  $F(100,192)$ : 2.4); during V2 cooling, the  $R^2$  values were 0.48 and 0.56 ( $P = 1 \times 10^{-7}$  and  $3 \times 10^{-8}$ ,  $F(100,246)$ : 2.3,  $F(100,192)$ : 2.5). The linear model could not account for differences in decoding accuracy between V4 and V2|3 cooling ( $R^2 = 29\%$ ,  $P = 0.84$ , 0.91,  $F(100,246)$ : 0.8,  $F(100,192)$ : 0.8). In summary, no shape- or category feature showed a statistical relationship with decoding accuracy reductions during cooling, suggesting that a yet-undiscovered image property is differentially represented among the pathways, or that image feature encoding does not differ between them. This oriented us to the possibility that the primary difference between these pathways is not between the bypass pathways, but between the long pathway and the bypass pathways themselves.

228

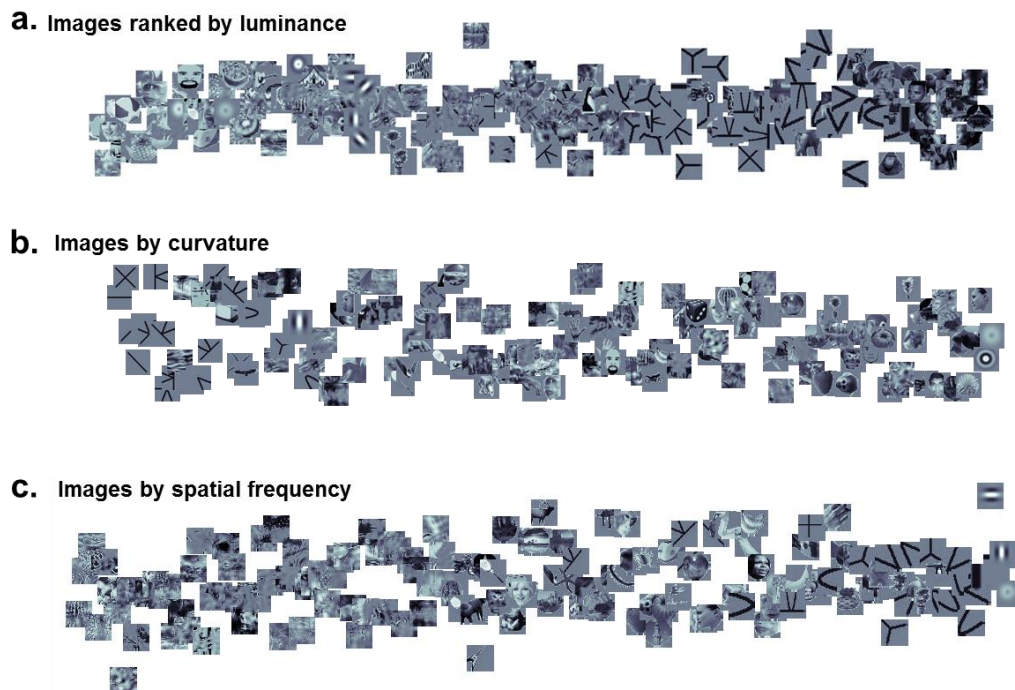

229

**Figure 5. Examples of three image features used to predict changes in accuracy. A.** Images sorted by their luminance value. **B.** Images sorted by their curvature content. **C.** Images sorted by the first Fourier-transform principal component (high vs. low spatial frequency content).

230

### Cooling parallels in the Standard Model of Visual Recognition

231 The previous results oriented us to compare PIT units that received inputs from the long  
232 (V1→V2→V4→PIT) pathway versus PIT units that received inputs from the short (V1→V2→PIT  
233 or V1→V4→PIT) pathways. This was outside our experimental reach, because both of our cooling  
234 interventions affected cells that depended on continuous information flow through the long  
235 pathway. Thus we proceeded by exploring simulated versions of these two PIT types, using the  
236 Standard Model of Visual Recognition, specifically the HMAX version of Serre, Oliva and Poggio  
237 (2007). This is a hierarchical, feedforward-only model inspired by the visual system<sup>10,11</sup>,  
238 comprising comprises multiple layers (*areas*), each with many filters (*receptive fields*) of different  
239 sizes. The mean filter size per layer increases along the hierarchy, with small V1-like RF sizes in  
240 the first layer, and large AIT-like RF sizes in the last layer. Each layer performs two serial  
241 operations: a convolutional tuning operation followed by a pooling (invariance) operation. Inspired  
242 by the simple/complex cells in V1, the convolutional operation provides a measure of similarity  
243 between the input pattern and the “synaptic” weights of its filter. The outputs of different  
244 convolutional steps are then pooled using a maximum operation; this is a non-linear step that  
245 reduces multiple inputs into a single output, like a complex cell responding with its most active  
246 simple cell input. This pooling step results in fewer responses feeding into the next layer and more  
247 invariance to scale/position changes. At the highest layers of the model, there emerges a sparse  
248 population of units, whose activations encode an abstract representation of the original image.  
249 This response vector can be used in a final classification step to measure the accuracy of  
250 representation of the original image.

251 Our version of this model had three alternative pathways that could provide input to a  
252 given simulated PIT unit: the long pathway had four layers (V1→V2→V4→PIT); the second



253 pathway skipped the second layer (V1→V4→PIT), and the third pathway skipped the third layer  
 254 (V1→V2|3→PIT, **Fig. 6a**). Filter widths doubled at each layer, but for the bypass pathways, RF  
 255 size quadrupled at the bypass stage. This insured that all filters in a given area had the same  
 256 range of sizes, irrespective of their inputs. The key difference in filter shapes between the long-  
 257 and short-pathway inputs was the level of detail present in the filters: for example, V4 units shaped  
 258 from V2 inputs were more abstract than V4 units shaped from V1 inputs, because the latter set of  
 259 filters sampled visual activity which had undergone one fewer round of max pooling. At the end  
 260 of the network, we decoded responses using SVMs in an all vs. all approach, with leave-one-out  
 261 cross-validation and shuffled-label control.

262

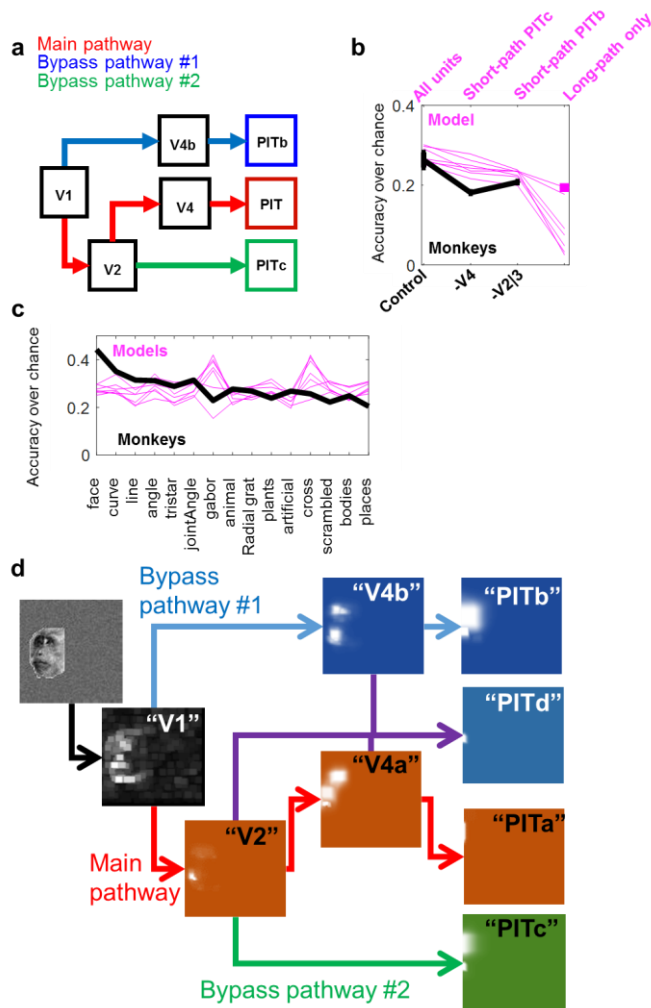

**Figure 6. a. Modified standard model of visual recognition (HMAX architecture).**

**b.** Mean classification accuracy over chance ( $\pm$  SEM), for both animals, during the warm, V4 and V2|3 deactivation (black) and for all simulated PIT populations in seven models (pink lines). The label “All units” refers to mixed short- and long-pathway PIT cells. The square under the “Long-path only” label shows the accuracy achieved when units were pooled from seven networks, in order to match cell count.

**c.** Accuracy per category for all seven models (pink). The black line shows the mean accuracy per category from the monkey data.

**d.** Example of activation of units at different layers in the hierarchy.

263

264 There were 58 units total at the final layer: 4 long-pathway units, 25 V1→V4→PIT units,  
 265 25 V2→PIT units, and 4 units that received mixed inputs from long- and short-pathways. SVMs  
 266 performed best at classifying each image when using a mix of long- and short-pathway units (N  
 267 = 58), scoring  $28 \pm 1\%$  after baseline subtraction, mean of seven models  $\pm$  SEM). For comparison,  
 268 SVMs trained on the control monkey data showed an average of  $26 \pm 2\%$  after baseline  
 269 subtraction. When SVMs were trained using data from only one population of simulated PIT cells,  
 270 they performed worse than when using the mixed population (PITc:  $24 \pm 1\%$ , PITb:  $24 \pm 1\%$ , PIT:  
 271  $9 \pm 3\%$ ; **Fig. 6b**). Within each model, the number of simulated PIT units at each short-pathway was

272 the same ( $N = 25$  units per final bypass layer), but the number of long-pathway units was lower  
 273 because of the additional pooling stage ( $N = 4$ ); this partially explains why SVMs performed so  
 274 low when using long-pathway values only. To correct for this, we also trained SVMs using all the  
 275 long-pathway units from seven different networks: pooled together, these 28 units still performed  
 276 worse ( $19 \pm 1\%$  above baseline) than SVMs trained on a mixed population. These reductions in  
 277 simulated PIT cell diversity were similar to the accuracy from cooling data (mean  $-V4$  deactivation  
 278 performance was 16% and  $-V2|3$  deactivation performance 19%, averaging both monkeys).

279 Unlike the monkey PIT units, which led to the highest classification accuracy for faces, the  
 280 entire population of simulated PIT model units showed highest accuracy values for line shapes,  
 281 bodies and artificial objects (24-34% over chance for all categories, **Fig 6c**). Visual examination  
 282 of the activation patterns within each layer highlighted interesting differences (**Fig. 6d**). Units in  
 283 the early layers ( $V2$ ,  $V4$ ) of the long pathway lit up local features, like eyes, but in subsequent  
 284 layers (PIT) of the long pathway, these features were pooled into more complex feature  
 285 selectivities. These long-pathway units looked like they would be good at discriminating complex  
 286 images, but at the expense of representing more primitive geometric features. In contrast, PIT  
 287 units receiving inputs from the bypass pathways seemed to preserve the explicit representation  
 288 of the more primitive sub features. We tested this observation as follows. We compared the image  
 289 selectivity to local and global features of two classes of simulated PIT cells – those at the terminus  
 290 of the long pathway or the short  $V1 \rightarrow V4 \rightarrow$  PIT pathway. We used images of 10 faces and 10  
 291 quadrupeds from our 293-image set. We used SVMs to interrogate the long- and short-pathway  
 292 units on four tasks, where success in each task depended on discriminating local vs. global  
 293 features. The tasks were to classify 1) faces vs. quadrupeds, 2) heads vs. faceless heads, 3)  
 294 faces vs eyeless faces, and 4) quadrupeds vs. legless quadrupeds (**Fig. 7**). The first two  
 295 comparisons involved many local features (a global comparison), the second two comparisons  
 296 involved a local feature. The pathways performed differently: for the global task, the long-pathway  
 297 units showed better performance than the short-pathway units (accuracy classifying faces vs.  
 298 heads, long-pathway:  $0.58 \pm 0.05$ , short-pathway:  $0.54 \pm 0.06$ ; faces vs quadrupeds: long-pathway:  
 299  $0.58 \pm 0.05$ , short-pathway:  $0.57 \pm 0.07$ ). For the local-feature tasks, the short-pathway units  
 300 allowed better performance than the long-pathway units (accuracy detecting missing eyes, long  
 301 pathway:  $0.58 \pm 0.05$ , short pathway:  $0.64 \pm 0.04$ ; accuracy detecting missing legs: long pathway:  
 302  $0.53 \pm 0.06$ , short pathway:  $0.66 \pm 0.06$ ). This suggested that in the macaque brain, short pathways  
 303 could be helpful for fine, local-feature discriminations, while the long pathways could implement  
 304 Gestalt-like, global discriminations.

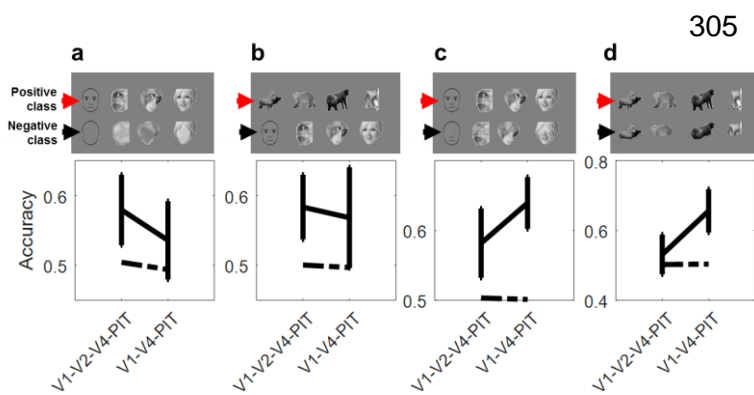

**Figure 7. Sensitivity to image parts by long- and short-pathway units.**

Classification accuracy differences among different pathways. Solid lines show mean SVM accuracy values, error bars show standard error of the mean. Broken lines show accuracy after label shuffling. **a.** Heads vs. faceless heads. **b.** Faces vs. quadrupeds. **c.** Faces vs. eyeless faces. **d.** Quadrupeds vs. legless quadrupeds.

306

## 307 Cooling affected fine discrimination less than coarse discrimination

308 The cooling interventions always disrupted the long pathway but preserved at least one  
309 short pathway. If the short pathways are more important for local (fine) discriminations and the  
310 long pathway more important for global discriminations, then during cooling, SVMs should perform  
311 better with local discriminations because of these remaining short pathways. We wanted to test  
312 this hypothesis, so first we had to define “local” vs. “global” discriminations in the context of our  
313 data.

314 The decoding accuracy analysis (**Fig. 2**) showed that monkey PIT populations  
315 discriminated some images more accurately than others. The image pairs that were hard to  
316 discriminate must have had similar locations in the neural activity space: the closer the images,  
317 the more likely that individual trials were on the wrong side of the dividing linear hyperplane. We  
318 ranked the decoding accuracy for each image as a function of the Euclidean distance to its  
319 neighbors (in the original 100+ dimensional activity space). This plot showed that decoding  
320 accuracy for two images increased with their distance in activity space. It also showed that very  
321 close neighbors were systematically misclassified (**Fig. 8a**, bottom). Thus we can interpret  
322 distance as a continuous metric for local-feature vs. global-feature discriminations: close image  
323 neighbors activate similar feature detectors in PIT relative to distant image pairs.

324 We then asked whether the cooling reduction in accuracy varied with neighbor distance,  
325 and if so, whether that change could be predicted by a random cooling mechanism like those of  
326 **Figure 3**. These random cooling mechanisms were blind to the identity of each image and to their  
327 distances in activity space. This created two hypotheses: the first hypothesis was that the change  
328 in decoding accuracy as a function of distance will be either a simple multiplicative or subtractive  
329 change, captured by random cooling mechanisms. The second hypothesis is that the change in  
330 decoding accuracy as a function of distance will not be explained by a simple gain change, but in  
331 fact will be better preserved within short distances, as predicted by the convolutional model of  
332 visual recognition.

333 We plotted the decoding accuracy as a function of distance for the random cooling  
334 mechanisms and found that they showed a series of multiplicative changes to the control (warm)  
335 accuracy-distance plot (**Fig. 8b**); these curves showed small changes in accuracy for near-  
336 neighbors, and larger accuracy changes for far neighbors. In contrast, when we plotted the cooling  
337 data’s decoding accuracy as a function of distance, we found that these curves differed from the  
338 simulated-cooling curves within the range of short distances (**Fig. 8c-d**). The random cooling  
339 mechanism curves predicted small decrements in misclassification, but the cooling data showed  
340 a considerable improvement in classification. The cooling data and the simulated cooling data  
341 curves were otherwise well-matched at the mid- to far range of neighbor distance. To compute  
342 the statistical reliability of this observation, we derived the probability that the cooling median  
343 accuracy at each distance could be emitted by the simulation (we ran a Wilcoxon rank-sum test  
344 at the  $i$ th neighbor position, asking if the median accuracy measured in the cooling distribution  
345 was higher than the median accuracy derived from the simulation). We found that the nearest 28  
346 neighbors were reliably better classified than predicted by the simulation ( $P$  values ranged from  
347  $4 \times 10^{-35}$  to 0.03 within the nearest 28 positions, one-tailed paired Wilcoxon signed rank test,  $N =$   
348 640 images,  $Z$ -values = 1.9-12.3). This resilience in decoding accuracy for near neighbors is  
349 consistent with the interpretation that short pathways are most helpful with fine discrimination.

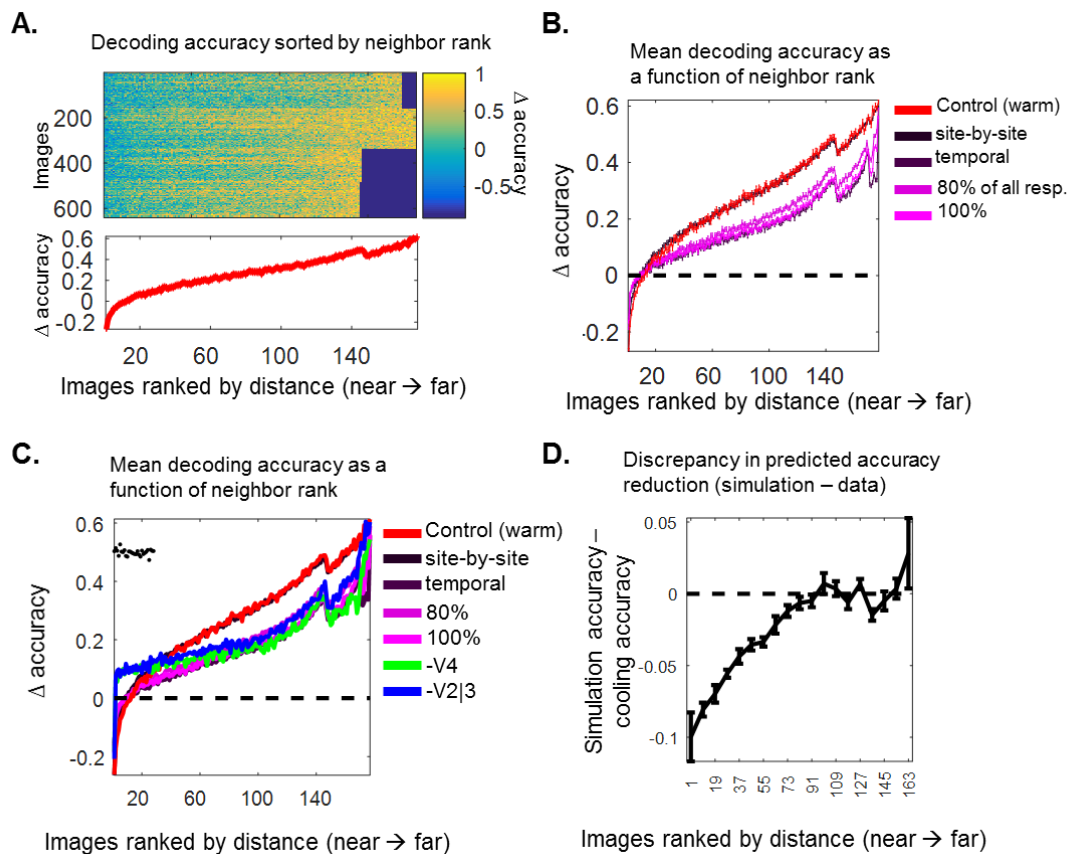

**Figure 8. Differences in decoding accuracy for near- vs. far neighbors.**

**a.** Linear decoding accuracy for every image (rows) when compared to its neighbors, as sorted by rank distance (columns). Top figure shows the decoding accuracy for all images, across days and monkeys. Bottom figure shows the mean decoding accuracy for each rank position ( $\pm$ SEM). Colors show the decoding accuracy minus the shuffled-label accuracy.

**b.** Mean decoding accuracy (minus shuffled baseline,  $\pm$  SEM) measured before cooling (red). The additional curves, colored in magenta, show the values for the different cooling simulations (see Figure 3 for a description of each mechanism).

**c.** Same as (c), but with data from V4 cooling (green) and V2|3 cooling (blue). Black dots show which image ranks show statistically differences between the cooling data and trial-by-trial model.

**d.** Discrepancy in predicted accuracy reduction between the simulation (trial-by-trial) and V4 cooling data. Each point shows the average for 10 neighbors ( $\pm$ SEM), from nearest to furthest.

350

351

## DISCUSSION

352

We investigated how posterior inferotemporal cortex cells combine information from areas V2, V3 and V4. We implanted microelectrode arrays in PIT while cooling areas V2/V3 or area V4. PIT multiunits showed a reduction in firing rate that was similar across both types of interventions. Support vector machines showed that classification accuracy was reduced more during V4 deactivation compared to V2|3 deactivation. Changes in classification accuracy could not be predicted by any class of visual features, such as contrast or spatial frequency content. This finding is consistent with previous iterations of the Standard Model of Visual Recognition, which implemented a hierarchical convolutional network where different bypass projections contain the

359

360 same types of visual features. This previous model also modeled bypass pathways and predicted  
361 a role for fine discrimination, and here we explore that idea further<sup>2</sup>. We confirmed that these  
362 pathways provide an advantage to simulated PIT units in fine discriminations. According to the  
363 model, the key contrast was between long-pathway PIT cells (V1→V2→V4→PIT) vs. short-  
364 pathway PIT cells (V1→V4→PIT), and these populations could not be isolated using our cooling  
365 technique. However, we found that images that are represented similarly in PIT activity space  
366 were better discriminated during cooling; this advantage was not predicted by non-specific cooling  
367 simulations.

368 Our principal conclusion is that input pathways of different lengths create a diversity of  
369 functional preferences in a given cortical region. We argue that multiple pathways allow some  
370 units to respond to complex features, and some units to simpler features. This raises several  
371 questions. First, in the context of a fine discrimination task, why would units with complex image  
372 preferences be less helpful than units with simpler image preferences? Cells with complex image  
373 preferences can be less responsive to variations of their preferred image: Kobatake and Tanaka  
374 have shown that IT cells have a minimum number of “critical features,” a minimal combination of  
375 image parts required to elicit a response<sup>12</sup>. If any of those features are missing, the cell may not  
376 respond at all. Thus in the context of detecting the presence of simple parts within a complex  
377 image, there may be an advantage of having cells tuned for the complex image along with cells  
378 tuned for its simple parts. This type of simpler preference is more likely to arise earlier in the visual  
379 hierarchy and become preserved by short bypass pathways. Did we miss any classes of 2-D,  
380 luminance shape features that might be differentially represented between the V2|3 and V4  
381 paths? While possible, there are no strong theoretical candidates for such features. Hegde and  
382 Van Essen (2007) compared the relative shape selectivities in neurons from V1, V2 and V4, and  
383 showed that these cells responded similarly to the same set of simple and complex images,  
384 offering little qualitative diversity<sup>13</sup>.

385 The V1-V2|3-V4 input pathway is the most important source of excitatory activity to PIT,  
386 and one might expect that its disruption would extinguish nearly *all* activity within the PIT scotoma.  
387 However, PIT units within the scotoma continued to respond, albeit weakly. This was because we  
388 did not cool all of V2, V3 or V4 – the scotomas covered only a few degrees of central vision, and  
389 near-foveal representations receive a disproportionate amount of cortical real estate in the brain.  
390 Indeed, cortical areas deep in the visual hierarchy receive too many inputs and may be practically  
391 impossible to silence without bilateral V1 resection, silencing of lateral connections and feedback:  
392 as an extreme example, anterior IT cells show no statistical change in overall firing rate after  
393 surgical resection of areas V4 and PIT<sup>14</sup>. Ultimately, we will get more answers to the problem of  
394 multiple pathways in macaque by recording from single units with known anatomical input profiles,  
395 a goal that may be met with the use of chemo- or optogenetics.

## 396 **METHODS**

397 All procedures were approved by the Harvard Medical School Institutional Animal Care  
398 and Use Committee, following the Guide for the Care and Use of Laboratory Animals (8th edition,  
399 National Academies Press). This paper conforms to the ARRIVE Guidelines checklist.

400 **Behavior.** Two adult male macaques (10 -17 kg) from the New England Primate Center  
401 were trained to perform a fixation task. The task required them to stare at a 0.5°-wide red or black  
402 square in the middle of the screen, keeping their gaze within  $\pm 1.3^\circ$  from the fixation spot. We used  
403 an ISCAN eye monitoring system to keep track of eye movements ([www.iscanin.com](http://www.iscanin.com)). The trial  
404 timeline was as follows: at the start of each trial, the fixation target appeared and the animal had  
405 up to eight seconds to direct its gaze to the fixation target. Once fixation was acquired, a small

406 reward could be delivered to encourage the animal. Within a random period between 17- 117 ms  
407 after fixation onset, an image appeared perifevally for 200 ms, then disappeared for 200 ms until  
408 a new image appeared. This on-off cycle could be repeated with 3-5 different images per trial. If  
409 the animal held fixation until the end of the final on-off cycle, a reward was dispensed. The reward  
410 size increased by 25% of the initial reward size every 100 trials.

411 **Animal care.** The animals were housed in a vivarium with a 12-h light/dark cycle, under  
412 social pairing. They worked during the daytime. The monkeys had no previous major surgical  
413 history.

414 **Visual stimuli.** We used MonkeyLogic to control experimental workflow  
415 (<http://www.brown.edu/Research/monkeylogic/>). We used 293 high-resolution images, including  
416 photographs and simple shapes. Photographs came from Google Images, and our choice of  
417 pictures were guided by categories used in previous IT studies<sup>15,16</sup> including animals, artificial  
418 gadgets, body parts, faces, places, plants/fruits(20-21 examples per category; faces and body  
419 parts were evenly distributed between monkey and human). Most of these images were used to  
420 create scrambled counterparts via the Portilla and Simoncelli visual texture model<sup>17</sup>, which  
421 transforms white noise into textures that share pairwise joint statistical constraints as the original  
422 intact images. These textures convincingly replicate small shape primitives present in the original  
423 images and scatters them throughout the image (118 textures). We also used 54 simpler line  
424 shapes such as lines, curves, tristars, radial and linear gabors, and simple combinations of lines  
425 and curves (joint angles). These line shapes were generated using the Cogent Matlab toolbox  
426 (developed by John Romaya at the LON at the Wellcome Department of Imaging Neuroscience,  
427 [http://www.vislab.ucl.ac.uk/cogent\\_graphics.php](http://www.vislab.ucl.ac.uk/cogent_graphics.php)). Images were 1.4° in width (for monkey G) or  
428 2.0° (for monkey R) at their longest axis. The images were not normalized for luminance, contrast  
429 or other visual properties.

430 **Implanted devices.** The cryoloops were manufactured in the laboratory of Stephen  
431 Lomber and are described in Lomber, Payne and Horel (1999)<sup>18</sup>. Cryoloops were composed of  
432 23-gauge hypodermic stainless steel tubing, shaped to fit the individual curvature of each animal's  
433 occipitotemporal shapes as determined by structural magnetic resonance images. The cryoloops  
434 were 3.5 mm wide and between 4-11 mm long. A microthermocouple sensor was attached to the  
435 stem of the cryoloop to monitor its temperature. The bodies of the cryoloops were wrapped in  
436 Teflon tubing except at the loop. The loops contained protected inlet/outlet ports that permitted  
437 the daily connection of Teflon tubes carrying chilled methanol, as driven by FMI "Q" Pumps (Model  
438 QG150, fluidmetering.com). The methanol was contained within the tubing system and could not  
439 cause any chemical harm to the tissue. The custom floating microelectrode arrays were  
440 manufactured by MicroProbes for Life Sciences (Gaithersburg, MD); each had 32 platinum/iridium  
441 electrodes per ceramic base, electrode lengths of 4-16 mm, impedances between 0.7- 1.0 MΩ,  
442 all connected to a 36-channel Omnetics connector (allowing for two additional grounds and two  
443 reference electrodes).

444 **Surgical procedures.** Both animals were implanted with custom-made titanium  
445 headposts before fixation training. After several weeks of post-surgical recovery and fixation  
446 training, the animals underwent a second surgery for the implantation of cryoloops and floating  
447 microelectrode arrays. Animals were anesthetized using ketamine/xylazine (I.M.) and isoflurane;  
448 buprenorphine/non-steroidal anti-inflammatories were used for pain control. In each animal, we  
449 performed a craniotomy centered at the lunate sulcus and extending antero-laterally. Monkey R  
450 received three cryoloops, two placed within the left lunate sulcus and one over the prelunate  
451 gyrus. The medial lunate sulcus loop was located 20 mm from the midline, traveled 7 mm deep  
452 into the sulcus and was 3 mm wide; the lateral lunate sulcus loop traveled 4.5 mm into the sulcus

453 and was 3.5 mm wide); the prelunate gyrus loop was placed anteriorly to the lunate sulcus loops,  
454 was 11 mm long and 3 mm wide. Monkey G received two cryoloops, one over the prelunate gyrus  
455 and one within the lunate sulcus. The lunate sulcus loop was placed 2.1 cm from the midline, was  
456 11 mm long with this axis running in the mediolateral axis within the lunate sulcus, 3 mm wide,  
457 and its most dorsal edge was 1.5 mm deep. The prelunate gyrus loop was also placed 2.1 cm  
458 from the midline, anteriorly to the lunate sulcus loop, ran 10.5 mm long and was 3 mm wide. We  
459 collected thermal images to map the spread of cooling from the tubing, and confirmed that it was  
460 limited to 1-3 mm radially, as first shown in previous publications<sup>19</sup>. Two to three floating  
461 microelectrode arrays were implanted within the same intraoperative session, after placement of  
462 the cryoloops. Their insertion sites were determined using three guidelines: they had to be anterior  
463 to the inferior occipital sulcus, many millimeters away from the prelunate gyrus cryoloop, and  
464 avoid large vasculature. All arrays were implanted caudal to the posterior middle temporal sulcus.  
465 We implanted two 32-channel arrays in monkey R, and one 32-channel plus two 16-channel  
466 arrays in monkey G.

467 **Experimental session workflow.** All data reported was collected within a couple of  
468 months after implantation. Each day, the animal would be head-fixed and its implants connected  
469 to the experimental rig: first the cryoloops were connected to the chilled-methanol-bath tubing and  
470 temperature sensors, then the microelectrode arrays were attached to their headstages. The first  
471 step each day was to calibrate our measurements of the animal's gaze using the built-in  
472 MonkeyLogic routine. We used the Plexon Multichannel Acquisition Processor (MAP) Data  
473 Acquisition System to collect electrophysiological information, including high-frequency ("spike")  
474 events, local field potentials and other experimental variables, such as eye position, reward rate  
475 and photodiode outputs tracking monitor frame display timing. Each channel was auto-configured  
476 daily for the optimal gain and threshold; we collected all electrical events that crossed a threshold  
477 of 2.5 standard deviations from the mean peak height of the distribution of electrical signal  
478 amplitudes per channel. These signals included typical single-unit waveforms, multi-unit  
479 waveform bursts, and visually-active hash.

480 The animal began its fixation task while we collected responses from the arrays with the  
481 cryoloops at body temperature (36-37°C; this is what we call "control" or the "warm" condition).  
482 After ~20 minutes of data collection to permit ~4-6 repetitions of each image, we activated either  
483 the V2|3 or V4 cryoloops, bringing the temperature of the cryoloops to ~9°C, which lowered the  
484 temperature of the adjacent cortex to 16-18°C. We waited for another 5 repetitions of each image  
485 to pass, and then turned off the cryoloop pumps and collected 1-2 more repetitions under this first  
486 re-warming session. We then paused the fixation task for 10 minutes to allow the tissue  
487 temperature to return to normal and preserve the animal's motivation for a second round of  
488 cooling. After 10 minutes, the temperature reported by the cryoloops was around 34°C, and we  
489 re-started our experiment. We repeated each image presentation 3-4 times and then activated  
490 the second set of cryoloop(s) (~8°C), waited for 5 repetitions and turned off the cryoloops. We  
491 then collected data until the animal was satiated. We balanced the order of the V2|3 vs. V4  
492 cryoloop activations: if on the first day we activated the V4 cryoloop first and V2|3 cryoloops  
493 second, the next day we activated the V2|3 cryoloops first and V4 cryoloop second. There was  
494 an even number of days for each cooling order.

495 **Electrophysiology data preparation.** The raw data files comprised event ("spike") times  
496 per channel for the entire experimental session (the number of channels available per day were  
497 64, but not all provided reliable signal-to-noise qualities). We divided each daily data set into  
498 thousands of raster plots defined by the onset of each image presentation and labeled each raster  
499 plot with its corresponding channel, image name and temperature condition. We defined three

500 windows of analysis: the baseline period lasted from 0-50 ms after image onset, the early period  
501 from 51-150 ms after image onset, the late period from 151-250 ms after image onset, a full image  
502 presentation window was 51-400 ms after image onset. We found that multiunit responses could  
503 last almost 400 ms, although their peak responses always occurred within the early window. Here  
504 we report responses within the full window minus the activity within the baseline window (we call  
505 these evoked responses). For all multivariate analyses, we normalized the activity of each site by  
506 transforming its evoked responses to z-scores: all evoked responses emitted by a single site  
507 during an experimental daily session were averaged, this mean response was subtracted from all  
508 individual evoked rates, and each value was then divided by the standard deviation of all evoked  
509 responses.

510 Although our full dataset contained 293 images, we did not have enough time to present  
511 all images every day and still get the minimum of 15 presentations across the control and cooling  
512 conditions. Thus we presented over half of the total image set each day (10 images from each  
513 complex category, such as faces and places, along with half of the scrambled textures per day,  
514 with most of the simple line shapes, rounding to about ~170-177 unique images per day). The  
515 responses of a given channel were correlated across days, but were also statistically different by  
516 multivariate descriptors such as multi-dimensional scaling. Because of these differences, we did  
517 not combine channel information across days and instead created a multi-day pseudo-population,  
518 where sets of concurrently recorded channels ( $N = 50-64$ ) from different days were treated as if  
519 recorded at the same time (see Ch. 19 of reference 20)<sup>20</sup>. Thus the final activity space is defined  
520 by firing rates collected across “site-days,” where some dimensions represent responses from the  
521 same channel to the same image collected on different days. Because the whole image set was  
522 presented on different days, we had two pseudopopulations per animal, each containing different  
523 site-day responses to each half of the image set. Each of our pseudopopulations had between  
524 100-300 multi-units.

525 **Scotoma mapping experiments.** The goal of these experiments was to identify the parts  
526 of the retinotopic field that were captured by our arrays, and the relative location of the response  
527 impairment caused by cooling. To achieve this goal, we had the animals fixate while we presented  
528 a single image (black-and-gray cartoon face, 2.0°-wide) within all positions in a radial grid (angular  
529 coverage of 0-315°, 45° steps; radial coverage of 0-8° from the center of the screen, in 0.5° steps).  
530 Three to five positions were randomly chosen per trial. After data collection, we defined evoked  
531 responses per position as follows: first we quantified the firing rate per site during the early window  
532 of activity (51-151 ms after stimulus onset) and then subtracted the firing rate per site during the  
533 baseline window of activity (0-50 ms after stimulus onset). We averaged these evoked responses  
534 per position within each site and used the `griddata.m` Matlab function to interpolate the scattered  
535 data into a continuous map. This map was smoothed using a 1°-diameter disk filter. This map  
536 represented the aggregate receptive field of each multiunit site in our arrays. To identify the overall  
537 scotoma, we averaged the response fields of all sites during the control condition and subtracted  
538 the average response fields of all sites during V2|3 or V4 deactivation. We measured the size of  
539 each scotoma by hand, using the `calcArea.m` function  
540 (<http://www.mathworks.com/matlabcentral>).

541 **Firing rate and latency.** The goal of these analyses was to measure changes in the  
542 overall firing rate (excitatory drive) of PIT multiunits during input deactivation. These changes  
543 included the amplitude of peristimulus rate histograms (PSTHs) and the latency of response. To  
544 quantify the changes in evoked response magnitude, we computed the evoked responses per  
545 site as described in *Ephys Data Preparation* and averaged these responses across all channels  
546 within each temperature condition. We did the same operation using z-scores. We calculated the



547 probability that the median responses emitted during each temperature condition (control, V4 and  
548 V2|3 cooling) were sampled from the same distribution using a Kruskal-Wallis one-way analysis  
549 of variance. To determine if there was a statistical difference between the V4 and V2|3 cooling  
550 condition responses, we used the Wilcoxon signed rank test for zero median. For the latency  
551 analyses, we obtained the mean PSTH in response to each image, per site and temperature, and  
552 then stacked all image-specific PSTHs in a matrix measuring  $N_{\text{images}} \times 400$  (ms after stimulus  
553 onset). We identified the time when each PSTH exceeded two standard deviations over baseline  
554 and called this *response latency*, with the only acceptance criteria that a plausible response  
555 latency would only occur between 30-200 ms after image onset. We also computed the earliest  
556 time point when all PSTHs demonstrated the greatest variance in amplitude, as an indicator of  
557 the *tuning* latency.

558 **How we identified channels with reliable visually driven activity.** Many electrodes in  
559 the arrays reported electrical activity that was not visually driven, possibly because the electrodes  
560 were on the pial surface. We repeated this analysis only using channels that showed a statistical  
561 difference in mean activity between the baseline and evoked time periods. Using a cross-  
562 validation approach, we used 5% of all trials to perform a Wilcoxon signed rank test for the median  
563 rate difference during each interval. This told us which channels showed a statistical difference in  
564 rate during visual stimulation. We then used the remaining 95% of trials to compute the firing rates  
565 during baseline and evoked windows for the selected channels. Monkey R's arrays showed 38  
566 out of 64 visually responsive sites; monkey G, 30 out of 64 ( $P < 0.05$ , two-tailed Wilcoxon signed  
567 ranked test for zero median).

568 **Encoding accuracy analyses.** We trained support vector machines with a linear kernel  
569 using the Matlab function `fitcsvm.m`. We used an all-vs.-all approach, with SVMs trained to  
570 discriminate between pairs of images, using leave-one-out cross-validation. There were 4-5  
571 response vectors per class within each comparison (the data used for classification were Z-score  
572 vectors; see *Spike Data Preparation*). To estimate the chance accuracy for each paired  
573 comparison, we concurrently trained SVMs using the same set of data vectors but with shuffled  
574 labels. The number of vectors for each two-class comparison was small, and thus we found that  
575 chance accuracy values could vary between 0-1 across all comparisons; the median shuffled-  
576 label misclassification rates were 0.60-0.63 for monkeys R and G. We subtracted the chance,  
577 shuffled-label accuracy classification rate from the correct-label accuracy classification rates to  
578 account for this bias. As an insight to explain this deviation from the expected chance accuracy  
579 of 0.5, we trained SVMs to distinguish between stimulus categories (listed in the *Visual Stimuli*  
580 section). Each category pair comparison involved 10-20 times as many response vectors as the  
581 individual image-vs-image SVM analyses, and the dataset was otherwise identical. Here we found  
582 a more reassuring shuffled-label statistical baseline of 0.50 in both animals. Both the category  
583 and image-per-image SVM accuracy analyses led to the same conclusions presented in the  
584 *Results* section.

585 **Projection analysis.** The goal of this analysis was to reconcile the findings that cooling  
586 V2|3 and V4 led to equivalent reductions in PIT population firing rates, but different reductions in  
587 classification accuracy. We measured the cooling trajectory traveled by each image during V2|3  
588 or V4 cooling and to project it onto the direction of a minimum response vector, where this  
589 direction represented a non-specific reduction in firing rate across all sites. We conducted the  
590 analysis as follows; first, for every pseudo-population, we defined a minimum response vector  
591  $\mathbf{v}_{\min} = \{\min \arg(\mathbf{x}_j)\} = \{\min \arg(x_1), \min \arg(x_2), \dots, \min \arg(x_n)\}$ , where  $\mathbf{x}_j$  is a variable representing  
592 all the mean responses from the  $j$ th array site and  $n$  is the number of sites, thus the vector length  
593 is  $n$ . Next, we computed three mean vectors per image:  $\mathbf{v}_{\text{warm}} = \text{mean response vector for the}$

594 given image during the control condition, also of length  $n$ ;  $\mathbf{v}_{-v4}$  = mean response vector for the  
595 given image during V4 cooling and  $\mathbf{v}_{-v2}$  = mean response vector for the given image during V2|3  
596 cooling. We computed the cooling trajectory vector of each image as  $\mathbf{V}_{\text{warm-v4}} = \mathbf{V}_{\text{warm}} - \mathbf{v}_{-v4}$  and  
597  $\mathbf{V}_{\text{warm-v2}} = \mathbf{V}_{\text{warm}} - \mathbf{v}_{-v2}$ . Finally, each individual trajectory was projected onto the vector  $\mathbf{V}_{\text{warm}} - \mathbf{V}_{\text{min}}$ ;  
598 the projected (parallel) component was subtracted from the cooling trajectory vector to compute  
599 the perpendicular component.

600 **Cooling simulations using the control data.** We simulated the effects of cooling on the  
601 control decoding accuracy, by applying fractional reductions to the control spike rates. The  
602 approach was to first identify the fractional reductions in firing rate for all channels during cooling  
603 in a given pseudo-population and then to use this fractional distribution to simulate cooling  
604 changes with data from a different pseudo-population. Fractional reductions were defined as  $f_i =$   
605  $r_{i, \text{cooling}} / r_{i, \text{control}}$ , where  $r_i$  is the mean firing rate for a given channel  $i$  in a pseudo-population  $i = 1-$   
606  $300$ . We sampled values from each fractional distribution with replacement and multiplied warm  
607 firing rates in three different ways. In all cases, we can envision the control data set as a matrix  
608 of dimensions  $r \times c$ , where rows are multiunit sites (channels) and columns are individual image  
609 presentations. In the first mechanism, *site-by-site cooling*, we sampled  $r$  fractional changes and  
610 multiplied each sample times all the responses in one channel. In the second mechanism,  
611 *temporal cooling*, we sampled  $c$  fractional changes and multiplied each fractional change times  
612 all elements in the column. Finally, in the third mechanism, we randomly selected a given  
613 percentage of responses in the matrix, and multiplied them by an equal number of sampled  
614 fractional values (the *mixed site-by-site* and *temporal cooling*). We used each transformed control  
615 matrix to train and test support vector machines as described above.

616 **Selectivity analyses (F-statistics).** In this analysis, the F-statistic was used as a  
617 measure of selectivity for each multiunit. The F-statistic is a ratio of mean squares, specifically  
618 the mean square error estimate for the variance of responses among images, divided by the mean  
619 square error estimate for the variance within each image. We computed each F-statistic in a  
620 channel by channel basis using the responses to all images within each temperature condition.  
621 For each channel, one F-statistic was computed using the warm data ( $F_{\text{control}}$ ), another using the  
622 V4 cooling data ( $F_{-v4}$ ) and another using the V2|3 cooling data ( $F_{-v2|3}$ ). We plotted each  $F_{\text{control}}$   
623 against its paired  $F_{-v4}$  and  $F_{-v2|3}$  values. To determine if the slope in each given scatterplot was  
624 different from unity, we used a bootstrap approach, where we computed 1,000 different slopes by  
625 sampling each channel with replacement (note that we kept each F-ratio trio together; we did not  
626 mix warm and cooling F-statistics from different channels). We then asked if the slope distribution  
627 from this bootstrap included 1.

628 We used randomization to measure any differences between the mean slopes computed  
629 during the V4 and V2|3 cooling conditions (that is, whether there was a difference between the  
630 mean  $F_{-v4} / F_{\text{control}}$  slope vs. the mean  $F_{-v2|3} / F_{\text{control}}$  slope). The null hypothesis is that the mean  
631 V4 and V2|3 slopes came from the same distribution. Therefore, we had to create this null  
632 distribution. In each of 1,000 passes, we randomly mixed the labels between the V4 and V2|3 F-  
633 statistics for each channel and computed a  $F_{\text{cooling}} / F_{\text{control}}$  slope. We did that twice per pass, and  
634 then subtracted the two slopes. After 1,000 passes, we had 1,000 slope differences that we then  
635 compared to the experimental slope difference. We found that these null difference distributions  
636 were defined by 5<sup>th</sup> and 95<sup>th</sup> percentile values of -0.07 to 0.07 (monkey R) and -0.05 to 0.05  
637 (monkey G). The observed differences in mean cooling slopes were -0.18 and -0.06 (monkeys R  
638 and G). The probability that the experimental differences in V4 and V2|3 slopes came from such  
639 mixed distributions were 0.001 and 0.02.

640 **How we defined response field overlap with the scotoma, for the F-statistic analysis.**

641 For each channel, its RF overlap was defined as the average number of spikes emitted in  
642 response to stimuli presented in the stimulus/scotoma region, divided by the total number of  
643 spikes emitted in the central  $8 \times 8^\circ$ . The mean RF overlap value was  $0.12 \pm 0.01$  and  $0.15 \pm 0.01$   
644 (monkeys R, G).

#### 645 **Linear regression model.**

646 The goal of this analysis was to determine whether the change in classification accuracy  
647 during V4 cooling or during V2|3 cooling could be predicted using different image features. The  
648 regression matrix had dimensions of  $293 \times 87$  (images  $\times$  visual features). The features were  
649 luminance (defined as the mean pixel value transformed by the monitor's gamma function),  
650 contrast (variance of the pixel values transformed by the monitor's gamma function), horizontal  
651 vs. vertical power (obtained via a wavelet decomposition analysis using the Matlab function  
652 `wavedec2.m`), curvature (defined by the variance of each image's discrete Fourier transform  
653 spectral power around all orientations), 50-pixel-based principal components as defined by the  
654 `pca.m` function), 30 spatial frequency principal components (`pca.m` applied to the discrete Fourier  
655 transformed images), categorical membership (defined *a priori* as angles, animal, artificial,  
656 bodies, cross, curve, face, gabors, radial gabors, joint angles, line, places, plants, scrambled,  
657 tristar), the mean population control firing rate per image and control classification accuracy per  
658 image. Values within each feature group were z-scored before fitting. The dependent variables  
659 were either 1) accuracy loss during V4 cooling (control accuracy per image minus  $-V4$  accuracy),  
660 2) accuracy loss during V2|3 cooling (control accuracy per image minus  $-V2|3$  accuracy) or 3)  
661 the difference in accuracy loss during V4 minus V2|3 cooling ( $[\text{control accuracy per image minus}$   
662  $-V4 \text{ accuracy}] - [\text{control accuracy per image minus } -V2|3 \text{ accuracy}]$ ). The probability that the  
663 linear model differed from the constant model was obtained two ways: first, we used the t-statistic  
664 provided by the `fitglm.m` function; second, we used a randomization test where the dependent  
665 variable was fit with a regression table made up of random numbers, sampled from a flat  
666 distribution. The table had the same dimensions as the true data matrix table. The  $R^2$  values of a  
667 thousand randomization tests were compared to the  $R^2$  from the regular regression table. To  
668 identify the most interesting predictors, we looked at all 87 regression weights and their t-statistics.  
669 There was one clear outlier: the control classification accuracy (t-statistics 8.6-8.7). We also fitted  
670 a regression analysis that penalized the number of regression weights (the Lasso). To insure that  
671 this was not simple regression to the mean, we also divided our control trials such that the control  
672 classification tuning curve used for regression was not the same as the control classification  
673 tuning curve used to calculate the cooling difference in classification accuracy (the estimated  
674 correlation between these cross-validated data sets were 0.33-0.45 for monkeys R and G,  $P <$   
675  $10^{-8}$ , two-tailed Student's T-test).

#### 676 **Standard model of visual recognition**

677 Our computational model was based on an implementation by Serre, Oliva and Poggio  
678 (2007)<sup>5</sup>, available at <http://cbcl.mit.edu/software-datasets/standardmodel/index.html>. This model  
679 belongs to the family of hierarchical feedforward models (HMAX) by Riesenhuber and Poggio  
680 (1999)<sup>21</sup> and developed over subsequent publications<sup>2,22,23</sup>. The model represents the visual  
681 object recognition system as a series of convolutional and pooling operations, which transform an  
682 image from pixels into neuronal responses. These responses can be used in a statistical classifier  
683 to decode their abstracted representational content.

684 The architecture of our network was three to four layers deep and contained three  
685 pathways: one main pathway and two bypass pathways. The main pathway had four layers: layer  
686 1 (representing V1), layer 2 (V2|3), layer 3 (V4), and layer 4 (PIT units receiving inputs from the

687 main pathway). The second pathway had three layers: layer V1, layer V4b (representing units in  
688 V4 receiving direct input from V1) and layer PITb (PIT units receiving input solely from the V1→V4  
689 inputs). The third pathway also had three layers: layer V1, layer V2|3 and layer PITc (units in PIT  
690 receiving input directly from V2|3). These three types of “PIT” neurons showed different kinds of  
691 activation patterns, which we could decode using support vector machines.

692 Layers. Each layer represented a stereotypical set of operations: a convolution/tuning  
693 operation and a pair of max operations. The tuning operation is equivalent to a simple cell, which  
694 convolves the input with a filter bank via the tuning function  $r = \exp(-\frac{1}{2\sigma^2} \sum_{j=1}^{N_{comb}} (w_j - x_j)^2)$ ,  
695 where  $\sigma$  = sharpness parameter,  $N_{comb}$  is the number of filters to combine,  $w$  = filter weight and  $x$   
696 = input image or activity. This simple cell operation describes the Euclidean distance between the  
697 RF shape and the incoming input. Different simple cells are characterized by different shapes and  
698 sizes of their RF patches. There are more than one receptive field sizes at each layer, and each  
699 filter-size convolution is performed in parallel. Several outputs of this tuning operation are then  
700 combined in a complex-cell-like operation. *Complex cells* perform a pooling operation: they  
701 receive inputs from  $N_s$  simple cells with different RF sizes and compute the maximum response  
702 emitted by the set. Thus the output of a complex cell layer is sparser than the output of a simple  
703 cell layer, because maximum values are repeated across limited areas of response space. These  
704 complex layer responses are finally subsampled, imitating the decreasing number of cells that  
705 can cover visual space as one moves down the visual pathway.

706 Building the model required two major implementation stages: first we had to create  
707 receptive field (RF) patches for each layer and second, use these RF patches to compute  
708 responses to our experimental images. As in the 2007 publication, the patches were imprinted  
709 using experience-dependent activity.

710 Filters. Each layer contained a set of up to 200 unique filters: the V1 layer filters were  
711 Gabors at four orientations and eight sizes (3-10 pixels wide, or 0.1-0.4° wide given our monitor  
712 distance). Subsequent layer filters were imprinted using random samples of activity from the  
713 preceding layer. To train these filters, we randomly selected images from the Caltech-256  
714 database and passed them through the V1 layer: the resulting activity patterns were sampled  
715 randomly to imprint filter shapes for the V2 layer<sup>22</sup>. Another set of images was passed through the  
716 V1→V2 layers, and that set of activity patterns was used to imprint filter shapes for the V4 layer.  
717 We did this for every layer in the long and short pathways. After repeating this process hundreds  
718 of times, this resulted in a model with different filter shapes at each layer. Filter sizes doubled at  
719 every hierarchical step, with the exception of the bypass pathways, where filter sizes quadrupled  
720 in width at the one skip level (e.g. V4 filters in the V1→V4 pathway were four times the size of V1  
721 filters; PIT filters in the V1→V2|3 pathway were four times the size of V2|3 filters). To make sure  
722 that the RF shapes would match the statistics of natural images presented close to and far from  
723 the fovea, we also imprinted using differently sized variants of the same images (1°-, 2°- and 4°-  
724 wide versions of the same image).

725 Experimental image testing. We began with 293 different images for our experimental  
726 dataset. In the electrophysiology experiments, we presented each image multiple times and  
727 obtained a distribution of correlated but non-identical response vectors for each individual image.  
728 To mimic this trial-by-trial variability in the model, we created six variations of all 293 images,  
729 adding pixel-by-pixel noise and random changes in position, simulating differences in fixational  
730 eye movements. We then transformed our 293x6 experimental images into simulated PIT  
731 responses using the fully assembled network, and used SVMs to measure the classification  
732 accuracy from the model PIT units, SVMs were used in an all-vs.-all approach, with leave-one-

733 out cross-validation and shuffled-label randomization control. The key theoretical contrasts were  
734 the relative performances between PIT units receiving inputs from different pathways: the  
735  $V1 \rightarrow V2|3 \rightarrow V4 \rightarrow \text{PIT}$  pathway, the  $V1 \rightarrow V4 \rightarrow \text{PIT}$  pathway and the  $V1 \rightarrow V2|3 \rightarrow \text{PIT}$  pathway. We  
736 considered the long-pathway PIT units to represent our control temperature population, the latter  
737 the deactivated state units.

738 **Local vs. global feature analysis.** The purpose of this analysis was to determine whether  
739 closely represented images suffered the same proportional reduction in discriminability as  
740 distantly represented images. Distance was determined using a Euclidean approach, measured  
741 in activity space; coordinates within this activity space were defined by the activity of multiunits  
742 within each pseudo-population. We used the `pdist.m` function in Matlab to obtain the distance  
743 between each pair of images (in z-score-normalized activity space), using control (warm) data.  
744 We then cycled through each image and rank-ordered all the other images by their distance to it:  
745 the images with the smallest Euclidean distance were ranked first, those with the longest distance  
746 last. We then used this ranking to sort the cooling classification accuracy values for that same  
747 pair of images. Note that the accuracy values were computed using different data from the data  
748 used to compute the distance ranking values. After cycling through all images, this resulted in a  
749 matrix of decoding accuracy values, where each row corresponded to an image, and each column  
750 corresponded to the accuracy value for its near to far neighbors. We then averaged this matrix to  
751 obtain the accuracy-distance curve. We repeated the same process using the simulation data:  
752 instead of using the cooling decoding accuracy values, we used the simulated cooling values.

753 Relevant data and code is available from the authors upon discussion.

754

755 **REFERENCES**

- 756 1. Distler, C., Boussaoud, D., Desimone, R. & Ungerleider, L. G. Cortical connections of  
757 inferior temporal area TEO in macaque monkeys. *J. Comp. Neurol.* **334**, 125–50 (1993).
- 758 2. Serre T, Kouh, M, Cadieu C, Knoblich U, Kreiman G, P. T. MIT AI Memo 2005–  
759 036/CBCL Memo 259. <ftp://publications.ai.mit.edu/ai-publications/2005/ AIM-2005-036.pdf> (2005). at <<ftp://publications.ai.mit.edu/ai-publications/2005/>>
- 761 3. Markov, N. T. *et al.* Weight consistency specifies regularities of macaque cortical  
762 networks. *Cereb. Cortex* **21**, 1254–72 (2011).
- 763 4. Markov, N. T. *et al.* A Weighted and Directed Interareal Connectivity Matrix for Macaque  
764 Cerebral Cortex. *Cereb. Cortex* (2012). doi:10.1093/cercor/bhs270
- 765 5. Serre, T., Oliva, A. & Poggio, T. A feedforward architecture accounts for rapid  
766 categorization. *Proc. Natl. Acad. Sci. U. S. A.* **104**, 6424–9 (2007).
- 767 6. Gattass, R., Gross, C. G. & Sandell, J. H. Visual topography of V2 in the macaque. *J.*  
768 *Comp. Neurol.* **201**, 519–539 (1981).
- 769 7. Gattass, R., Sousa, A. P. B. & Gross, C. G. Visuotopic organization and extent of V3 and  
770 V4 of the macaque. *J. Neurosci.* **8**, 1831–1845 (1988).
- 771 8. Baldassi, C. *et al.* Shape similarity, better than semantic membership, accounts for the  
772 structure of visual object representations in a population of monkey inferotemporal  
773 neurons. *PLoS Comput. Biol.* **9**, e1003167 (2013).
- 774 9. Brincat, S. L. & Connor, C. E. Underlying principles of visual shape selectivity in posterior  
775 inferotemporal cortex. *Nat. Neurosci.* **7**, 880–6 (2004).

- 776 10. Fukushima, K. Cognitron: a self-organizing multilayered neural network. *Biol. Cybern.* **20**,  
777 121–36 (1975).
- 778 11. Hubel, D. H. & Wiesel, T. N. Receptive fields, binocular interaction and functional  
779 architecture in the cat's visual cortex. *J. Physiol.* **160**, 106–54 (1962).
- 780 12. Kobatake, E. & Tanaka, K. Neuronal selectivities to complex object features in the ventral  
781 visual pathway of the macaque cerebral cortex. *J. Neurophysiol.* **71**, 856–67 (1994).
- 782 13. Hegd , J. & Van Essen, D. C. A comparative study of shape representation in macaque  
783 visual areas v2 and v4. *Cereb. Cortex* **17**, 1100–16 (2007).
- 784 14. Buffalo, E. A., Bertini, G., Ungerleider, L. G. & Desimone, R. Impaired filtering of  
785 distracter stimuli by TE neurons following V4 and TEO lesions in macaques. *Cereb.*  
786 *Cortex* **15**, 141–51 (2005).
- 787 15. Kiani, R., Esteky, H., Mirpour, K. & Tanaka, K. Object category structure in response  
788 patterns of neuronal population in monkey inferior temporal cortex. *J. Neurophysiol.* **97**,  
789 4296–309 (2007).
- 790 16. Kriegeskorte, N. *et al.* Matching categorical object representations in inferior temporal  
791 cortex of man and monkey. *Neuron* **60**, 1126–41 (2008).
- 792 17. Portilla, J. & Simoncelli, E. P. A Parametric Texture Model Based on Joint Statistics of  
793 Complex Wavelet Coefficients. *Int. J. Comput. Vis.* **40**, 49–70 (2000).
- 794 18. Lomber, S. G., Payne, B. R. & Horel, J. A. The cryoloop: an adaptable reversible cooling  
795 deactivation method for behavioral or electrophysiological assessment of neural function.  
796 *J. Neurosci Methods* **86**, 179 – 194 (1999).
- 797 19. Carrasco, A. *et al.* Influence of core auditory cortical areas on acoustically evoked activity

- 798 in contralateral primary auditory cortex. *J. Neurosci.* **33**, 776–89 (2013).
- 799 20. Kriegeskorte, N. & Kreiman, G. *Visual Population Codes: Toward a Common Multivariate*  
800 *Framework for Cell Recording and Functional Imaging*. (MIT Press, 2012). at  
801 <<https://books.google.com/books?id=GoI5hxBEjooC&pgis=1>>
- 802 21. Riesenhuber, M. & Poggio, T. Hierarchical models of object recognition in cortex. *Nat.*  
803 *Neurosci.* **2**, 1019–25 (1999).
- 804 22. Serre, T. *et al.* A quantitative theory of immediate visual recognition. *Prog. Brain Res.*  
805 **165**, 33–56 (2007).
- 806 23. Serre, T., Wolf, L., Bileschi, S., Riesenhuber, M. & Poggio, T. Robust object recognition  
807 with cortex-like mechanisms. *IEEE Trans. Pattern Anal. Mach. Intell.* **29**, 411–26 (2007).  
808  
809



810           **ACKNOWLEDGEMENTS**

811           We thank Gabriel Kreiman for his helpful comments in an earlier draft. This work was  
812 funded by NEI grant EY016187 (to MSL) and the Burroughs Wellcome Postdoctoral Enrichment  
813 Award (to CRP). Part of this work was realized with assistance from the Core Grant for Vision  
814 Research EY12196. Portions of this research were conducted on the Orchestra High  
815 Performance Compute Cluster at Harvard Medical School. This NIH-supported shared facility  
816 consists of thousands of processing cores and terabytes of associated storage and is partially  
817 provided through grant NCRR 1S10RR028832-01. See <http://rc.hms.harvard.edu> for more  
818 information. Part of this work was also conducted with support from Harvard Catalyst | The  
819 Harvard Clinical and Translational Science Center (National Center for Research Resources  
820 and the National Center for Advancing Translational Sciences, National Institutes of Health  
821 Award UL1 TR001102) and financial contributions from Harvard University and its affiliated  
822 academic healthcare centers. The content is solely the responsibility of the authors and does  
823 not necessarily represent the official views of Harvard Catalyst, Harvard University and its  
824 affiliated academic healthcare centers, or the National Institutes of Health.

825           **AUTHOR CONTRIBUTIONS**

826           CRP and MSL designed the experiments. CRP, SGL and MSL performed the surgical  
827 implantations and intraoperative cooling experiments. CRP conducted all following experiments  
828 and analyzed the data. CRP wrote the initial manuscript which was then edited by MSL and also  
829 approved by SGL.

830           **COMPETING FINANCIAL INTERESTS**

831           The authors have no competing financial interests.

832
